# Supplementary material for: Enhanced charge separation in La2NiO4 nanoplates by coupled piezocatalysis and photocatalysis for efficient H2 evolution
Source: Royal Society of Chemistry journal article supplement (doi:10.1039/d2nr01202b), 2022-01-01
Supplement: d2nr01202b1.pdf [file d2nr01202b1.pdf]

## Enhanced charge separation in $\text{La}_2\text{NiO}_4$ nanoplates by coupled piezocatalysis and photocatalysis for efficient $\text{H}_2$ evolution

Xinyu Ma<sup>1</sup>, Yangfei Gao<sup>2</sup>, Bian Yang<sup>3</sup>, Xiaojie Lou<sup>2,\*</sup>, Jianbing Huang<sup>1,\*</sup>, Dengwei  
Jing<sup>1,\*</sup>

<sup>1</sup>International Research Center for Renewable Energy & State Key Laboratory of Multiphase Flow in Power Engineering, Xi'an Jiaotong University, Xi'an 710049, P. R. China

<sup>2</sup>Frontier Institute of Science and Technology, State key Laboratory for Mechanical Behavior of Materials, Xi'an Jiaotong University, Xi'an 710049, P. R. China

<sup>3</sup>School of Materials Science and Engineering, Xi'an University of Technology, Xi'an 710048, Shaanxi, P. R. China

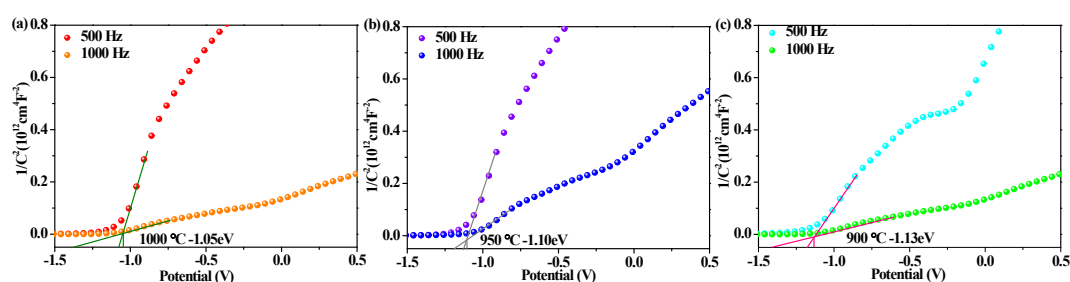

Fig. S1. The Mott-Schottky curves plots with different frequency of  $\text{La}_2\text{NiO}_4$  synthesized at 1000 °C, 950 °C and 900 °C.

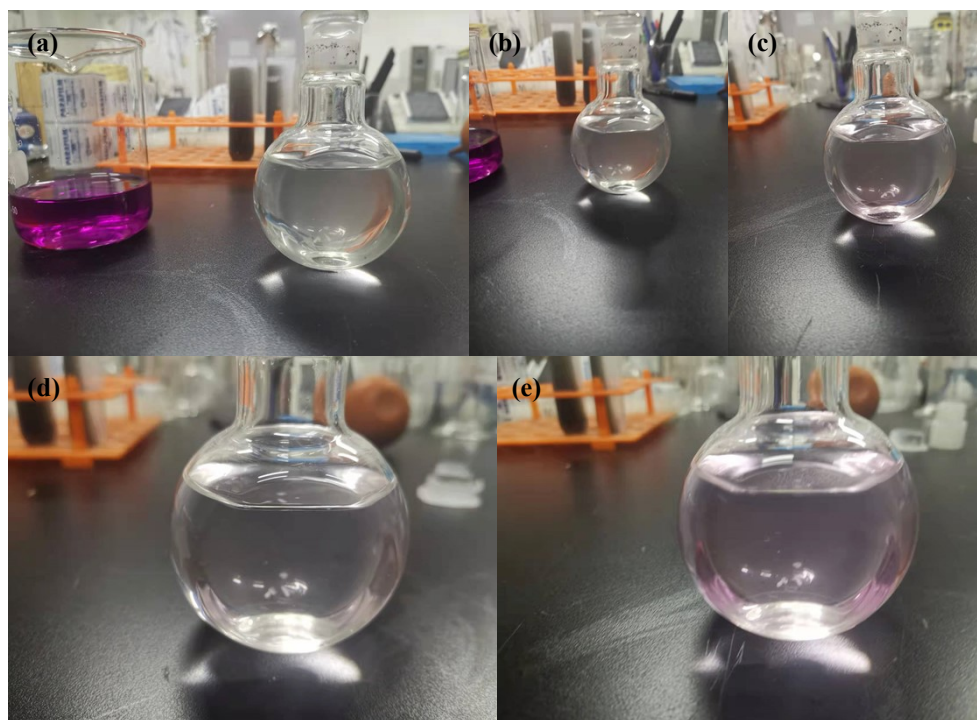

Fig. S2. The color of the solution after the reaction changes with the increase of the titer of acid potassium permanganate solution: (a) photo of the solution after the reaction clarified by

centrifugation, (b) photo of the solution after dropping 100  $\mu\text{L}$  0.002 mol/L acidic potassium permanganate solution, (c) photo of the solution after dropping 200  $\mu\text{L}$  0.002 mol/L acidic potassium permanganate solution, (d) photo of the solution after 10 minutes of rest, (e) photo of the solution after dropping 300  $\mu\text{L}$  0.002 mol/L acidic potassium permanganate solution.

The prepared solution of 0.002 mol/L potassium permanganate acidified with sulfuric acid was dropped into the solution after the hydrogen evolution reaction clarified by centrifugation as can be seen in Fig. S2a. After the first addition of 100  $\mu\text{L}$  acidic potassium permanganate solution, the solution after the hydrogen evolution reaction remained colorless and transparent as shown in Fig. S2b. After 100  $\mu\text{L}$  acidic potassium permanganate solution was added a second time, the solution after the hydrogen evolution reaction showed a slight pink color as can be seen in Fig. S2c. Then letting the solution after the hydrogen evolution reaction stand for 10 minutes and basically faded to clear (Fig. S2d). And then, after adding another 100  $\mu\text{L}$  of acid potassium permanganate solution, the solution after the hydrogen evolution reaction became pink and did not fade, as shown in Fig. S2e.
